# Supplementary material for: Potential evaporation at eddy-covariance sites across the globe
Source: Copernicus journal article supplement (doi:10.5194/hess-23-925-2019), 2019-02-18
Supplement: Supplementary file 1 [file hess-23-925-2019-supplement.zip]

# Potential evaporation at eddy-covariance sites across the globe

Wouter H. Maes, Pierre Gentine, Niko E.C. Verhoest, Diego G. Miralles

5

## Supplement

### S1. Calculation of $kB^{-1}$ when radiance fluxes are not separately measured

10 In 15 sites, the incoming and outgoing short- and longwave fluxes were not available and an alternative approach than explained in Section 2.3 was needed to calculate  $kB^{-1}$ . The roughness length  $r_{aH}$  and surface conductance  $g_c$  were calculated of daily values for four difference parameterisations of the Stanton number, and the parameterisation which gave the highest correlation between  $g_c$  and  $\lambda E_a$  was selected. The four tested parameterisations of the Stanton number were:

- 15 -  $kB^{-1}=2$  after Brutsaert [1]
- $kB^{-1}$  was a fixed value for each ecosystem, except croplands, after Rigden and Salvucci [2]. The Stanton number for all forest ecosystems was fixed at  $kB^{-1}=8$ , those of grassland and wetlands was  $kB^{-1}=2$ . For the savannah-type biomes, the fixed Stanton number was taken based on the general definition of each biome of the amount of tall ( $>2m$ ) and low ( $<2m$ ) woody cover. For instance, open
- 20 shrubland is defined as a vegetation in which the woody cover is less than 2 m and covers 10-60% of the area. Based on a fixed Stanton number of  $kB^{-1}=5$  for low woody vegetation covering an average of 35% of the area and a Stanton number of  $kB^{-1}=2$  for the remaining 60% of the low grass cover, the resulting Stanton number was estimated as  $kB^{-1}=0.35 \cdot 5 + 0.65 \cdot 2=3.05$ . Similarly, the  $kB^{-1}$  values for closed shrubland, savannah and woody savannah were 5, 3.2 and 4.7, respectively. For croplands,
- 25 the value is not fixed but is a function of the vegetation height. The  $kB^{-1}$  was equal to 2 when vegetation heights were below 0.5m, ranging between 2 and 5 when the vegetation was between 0.5m and 1m, and 5 when the vegetation height was taller than 1m.
- $kB^{-1}$  ranges between 2 and 8, depending on the vegetation height, with a value between 2 and 5 for ecosystem with vegetation height between 0.5 and 1m, and a value between 5 and 8 for ecosystems
- 30 with vegetation height between 1 and 20 m.
- $kB^{-1}$  is a function of the Reynolds number  $Re$ , with  $kB^{-1}=k (5.7 Re^{1/4} - 5)$  [1]

## S2. Corrected estimations of $E_p$ when conditions are not unstressed

The best performing  $E_p$  models (MD<sub>b</sub>, PT<sub>b</sub>, see Section 3.2) rely heavily on the available energy,  $R_n - G = (1 - \alpha) SW_{in} + \varepsilon LW_{in} - \varepsilon \sigma T_s^4 - G$  (See Eqs. 3, 4). In the calculations of  $E_p$  for comparison with  $E_{unstr}$  (Section 3.2), the values of albedo ( $\alpha$ ), surface temperature ( $T_s$ ) and ground heat flux ( $G$ ) were also reflecting those of unstressed ecosystems – we will refer to these values as  $\alpha_{unstr}$ ,  $T_{s\_unstr}$  and  $G_{unstr}$ . Since these are not forcing variables but ecosystem properties, correct  $E_p$  estimates in other conditions should also use  $\alpha_{unstr}$ ,  $T_{s\_unstr}$  and  $G_{unstr}$  rather than the actual  $\alpha$ ,  $T_s$  or  $G$ . Here we provide a method to estimate  $\alpha_{unstr}$ ,  $T_{s\_unstr}$  and  $G_{unstr}$  based on the unstressed records of the eddy flux observations and using the MD<sub>b</sub> method to estimate  $E_p$ :

$$\lambda E_p = \alpha_{MD} \left( (1 - \alpha_{unstr}) SW_{in} + \varepsilon LW_{in} - \varepsilon \sigma T_{s\_unstr}^4 - G_{unstr} \right) \quad (S1)$$

We use a site-specific approach to estimate  $\alpha_{unstr}$ . If the observed albedo was lower than 10<sup>th</sup> percentile albedo values of the unstressed subset or larger than the 90<sup>th</sup> percentile of this subset,  $\alpha_{unstr}$  was estimated as the 10<sup>th</sup> or 90<sup>th</sup> percentile, respectively. The calculation of  $G_{unstr}$  was done similarly: if the actual  $G R_n^{-1}$  was larger than the 90<sup>th</sup> percentile of  $G R_n^{-1}$  of the unstressed dataset,  $G_{unstr}$  was calculated from this 90<sup>th</sup> percentile; else, the actual  $G$  was used to estimate  $G_{unstr}$ . At global level,  $\alpha_{unstr}$  and  $G_{unstr}$  globally can be done using a biome-specific calibration of 10<sup>th</sup> and 90<sup>th</sup> percentile of  $\alpha$  and the 90<sup>th</sup> percentile  $G R_n^{-1}$ , similar as the way the key parameters were identified per biome.

From  $H = \rho_a c_p \frac{(T_0 - T_a)}{r_{aH}}$  and  $H_{unstr} = (1 - \alpha_{MD})(R_{n\_unstr} - G_{unstr})$  and in the assumption that  $T_0 = T_s$ ,  $T_{s\_unstr}$  is given by

$$T_{s\_unstr} = T_a + \frac{r_{aH} (1 - \alpha_{MD}) (R_{n\_unstr} - G_{unstr})}{\rho_a c_p} \quad (S2)$$

$T_{s\_unstr}$  and  $R_{n\_unstr}$  can be calculated by iterating Eqs. S1 and S2 for flux sites of which  $SW_{in}$ ,  $SW_{out}$  and  $LW_{in}$  were available.

## S3. Tables

**Table S1 Overview of the FLUXNET sites, their location, period with available data, the number of records of the final daily dataset, availability of soil moisture measurements and the reference or PI.**

| Biome                                   | Site   | Lat    | Lon     | Alt  | Country   | From    | Until   | # days | SWC | Ref/PI        |
|-----------------------------------------|--------|--------|---------|------|-----------|---------|---------|--------|-----|---------------|
| <i>Cropland (CRO)</i>                   |        |        |         |      |           |         |         |        |     |               |
|                                         | BE-Lon | 50.55  | 4.75    | 167  | Belgium   | 04/2004 | 12/2014 | 809    | x   | [3]           |
|                                         | DE-Geb | 51.10  | 10.91   | 162  | Germany   | 01/2001 | 12/2014 | 2472   | x   | [4]           |
|                                         | DE-Kli | 50.89  | 13.52   | 478  | Germany   | 05/2004 | 12/2014 | 910    | x   | [5]           |
|                                         | IT-CA2 | 42.38  | 12.03   | 200  | Italy     | 07/2011 | 12/2014 | 244    |     | B. Gioli      |
|                                         | US-ARM | 36.61  | -97.49  | 314  | USA       | 01/2003 | 12/2012 | 2084   | x   | [6]           |
|                                         | US-CRT | 41.63  | -83.35  | 180  | USA       | 01/2011 | 12/2013 | 667    | x   | [7]           |
|                                         | US-Lin | 36.36  | -119.84 | 131  | USA       | 11/2009 | 11/2010 | 310    |     | [8]           |
|                                         | US-Ne1 | 41.17  | -96.48  | 361  | USA       | 05/2001 | 05/2013 | 2854   |     | [9]           |
|                                         | US-Ne2 | 41.17  | -96.47  | 362  | USA       | 06/2001 | 05/2013 | 2921   |     | [9]           |
|                                         | US-Ne3 | 41.18  | -96.44  | 363  | USA       | 06/2001 | 05/2013 | 2912   |     | [9]           |
| <i>Grassland (GRA)</i>                  |        |        |         |      |           |         |         |        |     |               |
|                                         | AU-DaP | -14.06 | 131.32  | 71   | Australia | 09/2007 | 09/2013 | 803    | x   | [10]          |
|                                         | AU-Emr | -23.86 | 148.48  | 176  | Australia | 06/2011 | 12/2013 | 723    | x   | [11]          |
|                                         | AU-Rig | -36.65 | 145.58  | 151  | Australia | 01/2011 | 12/2014 | 552    |     | [10]          |
|                                         | AU-Stp | -17.15 | 133.35  | 250  | Australia | 08/2008 | 12/2014 | 1503   | x   | [10]          |
|                                         | AU-Ync | -34.99 | 146.29  | 126  | Australia | 10/2012 | 12/2014 | 439    | x   | [10]          |
|                                         | CN-HaM | 37.37  | 101.18  | 4003 | China     | 01/2002 | 12/2004 | 437    |     | [12]          |
|                                         | DE-Gri | 50.95  | 13.51   | 385  | Germany   | 01/2004 | 12/2014 | 1438   | x   | [5]           |
|                                         | IT-Tor | 45.84  | 7.58    | 2160 | Italy     | 06/2008 | 12/2014 | 513    | x   | [13]          |
|                                         | RU-Ha1 | 54.73  | 90.00   | 446  | Russia    | 06/2002 | 12/2004 | 303    |     | D. Papale     |
|                                         | US-AR1 | 36.43  | -99.42  | 611  | USA       | 04/2009 | 12/2012 | 931    | x   | D. Billesbach |
|                                         | US-AR2 | 36.64  | -99.60  | 646  | USA       | 04/2009 | 08/2012 | 816    | x   | D. Billesbach |
|                                         | US-ARb | 35.55  | -98.04  | 424  | USA       | 03/2005 | 10/2006 | 424    | x   | M. Torn       |
|                                         | US-ARc | 35.55  | -98.04  | 424  | USA       | 03/2005 | 10/2006 | 442    | x   | M. Torn       |
|                                         | US-Cop | 38.09  | -109.39 | 1520 | USA       | 04/2001 | 11/2007 | 741    |     | [14]          |
|                                         | US-Goo | 34.26  | -89.87  | 87   | USA       | 05/2002 | 12/2006 | 775    |     | T. Meyers     |
|                                         | US-IB2 | 41.84  | -88.24  | 227  | USA       | 10/2004 | 12/2011 | 1474   | x   | R. Matamala   |
|                                         | US-LWW | 34.96  | -97.98  | 365  | USA       | 01/1997 | 12/1998 | 513    |     | [15]          |
|                                         | US-SRG | 31.79  | -110.83 | 1291 | USA       | 03/2008 | 12/2014 | 1969   | x   | [16]          |
|                                         | US-Var | 38.41  | -120.95 | 129  | USA       | 11/2000 | 12/2014 | 3804   | x   | [17]          |
|                                         | US-Wkg | 31.74  | -109.94 | 1531 | USA       | 05/2004 | 12/2014 | 3366   | x   | [18]          |
| <i>Deciduous Broadleaf Forest (DBF)</i> |        |        |         |      |           |         |         |        |     |               |
|                                         | AU-Lox | -34.47 | 140.66  | 45   | Australia | 08/2008 | 06/2009 | 189    |     | [19]          |
|                                         | CA-TPD | 42.64  | -80.56  | 260  | Canada    | 01/2012 | 12/2014 | 422    | x   | A. Arain      |
|                                         | DE-Hai | 51.08  | 10.45   | 430  | Germany   | 01/2000 | 12/2009 | 1597   | x   | [20]          |
|                                         | DK-Sor | 55.49  | 11.65   | 40   | Denmark   | 04/2001 | 12/2014 | 1315   |     | [21]          |
|                                         | IT-CA1 | 42.38  | 12.03   | 200  | Italy     | 06/2011 | 12/2014 | 223    |     | D. Parpale    |
|                                         | IT-CA3 | 42.38  | 12.02   | 197  | Italy     | 11/2011 | 12/2014 | 333    |     | D. Parpale    |
|                                         | IT-Col | 41.85  | 13.59   | 1560 | Italy     | 06/1996 | 12/2014 | 976    | x   | G. Matteuci   |
|                                         | IT-Isp | 45.81  | 8.63    | 210  | Italy     | 01/2013 | 12/2014 | 220    |     | [22]          |
|                                         | IT-PT1 | 45.20  | 9.06    | 60   | Italy     | 03/2002 | 10/2004 | 350    |     | G. Seufert    |

| Biome                                   | Site   | Lat    | Lon     | Alt  | Country         | From    | Until   | # days | SWC | Ref/PI       |
|-----------------------------------------|--------|--------|---------|------|-----------------|---------|---------|--------|-----|--------------|
|                                         | IT-Ro2 | 42.39  | 11.92   | 160  | Italy           | 01/2002 | 12/2012 | 839    | x   | D. Parpale   |
|                                         | US-MMS | 39.32  | -86.41  | 275  | USA             | 01/1999 | 12/2014 | 3235   | x   | [23]         |
|                                         | US-Oho | 41.56  | -83.84  | 230  | USA             | 01/2004 | 12/2013 | 1681   | x   | [24]         |
|                                         | US-WCr | 45.81  | -90.08  | 520  | USA             | 02/1999 | 12/2014 | 1754   | x   | [25]         |
|                                         | US-Wi8 | 46.72  | -91.25  | 348  | USA             | 05/2002 | 11/2002 | 84     |     | [26]         |
|                                         | ZM-Mon | -15.44 | 23.25   | 1053 | Zambia          | 03/2000 | 07/2009 | 510    |     | W. Kutsch    |
| <i>Evergreen Broadleaf Forest (EBF)</i> |        |        |         |      |                 |         |         |        |     |              |
|                                         | AU-Cum | -33.61 | 150.72  | 29   | Australia       | 10/2012 | 12/2014 | 512    |     | [11]         |
|                                         | AU-Rob | -17.12 | 145.63  | 709  | Australia       | 01/2014 | 12/2014 | 110    |     | [11]         |
|                                         | AU-Tum | -35.66 | 148.15  | 1259 | Australia       | 02/2001 | 12/2014 | 2824   | x   | [11]         |
|                                         | AU-Wac | -37.43 | 145.19  | 110  | Australia       | 08/2005 | 12/2008 | 147    |     | [10]         |
|                                         | AU-Wom | -37.42 | 144.09  | 705  | Australia       | 01/2010 | 12/2014 | 804    | x   | [11]         |
|                                         | BR-Sa3 | -3.02  | -54.97  | 100  | Brazil          | 06/2000 | 03/2004 | 399    |     | [27]         |
|                                         | FR-Pue | 43.74  | 3.60    | 270  | France          | 08/2002 | 12/2014 | 1556   |     | [28]         |
|                                         | GH-Ank | 5.27   | -2.69   | 124  | Ghana           | 02/2011 | 11/2014 | 91     |     | R. Valentini |
|                                         | MY-PSO | 2.97   | 102.31  | 147  | Malaysia        | 01/2003 | 12/2009 | 1271   | x   | [29]         |
| <i>Evergreen Needle Forest (ENF)</i>    |        |        |         |      |                 |         |         |        |     |              |
|                                         | AU-ASM | -22.28 | 133.25  | 606  | Australia       | 09/2010 | 12/2014 | 1082   | x   | [30]         |
|                                         | CA-Obs | 53.99  | -105.12 | 629  | Canada          | 04/1999 | 02/2002 | 104    |     | [31]         |
|                                         | CA-Qfo | 49.69  | -74.34  | 382  | Canada          | 09/2003 | 12/2010 | 1013   | x   | [32]         |
|                                         | CA-SF1 | 54.49  | -105.82 | 536  | Canada          | 07/2003 | 09/2006 | 613    | x   | [33]         |
|                                         | CA-SF2 | 54.25  | -105.88 | 520  | Canada          | 07/2001 | 09/2005 | 641    |     | [33]         |
|                                         | CA-TP1 | 42.66  | -80.56  | 265  | Canada          | 01/2003 | 12/2014 | 967    | x   | [34]         |
|                                         | CA-TP4 | 42.71  | -80.36  | 184  | Canada          | 05/2002 | 12/2014 | 1210   | x   | [34]         |
|                                         | DE-Lkb | 49.10  | 13.31   | 1308 | Germany         | 05/2009 | 12/2013 | 197    |     | [35]         |
|                                         | DE-Obe | 50.78  | 13.72   | 735  | Germany         | 01/2008 | 12/2014 | 964    |     | [36]         |
|                                         | DE-Tha | 50.96  | 13.57   | 380  | Germany         | 07/1996 | 12/2014 | 2694   | x   | [37]         |
|                                         | FI-Hyy | 61.85  | 24.30   | 181  | Finland         | 12/2002 | 12/2014 | 564    | x   | [38]         |
|                                         | IT-Lav | 45.96  | 11.28   | 1353 | Italy           | 01/2003 | 12/2014 | 1454   | x   | D. Gianelle  |
|                                         | IT-Ren | 46.59  | 11.43   | 1730 | Italy           | 11/1999 | 12/2013 | 792    | x   | [39]         |
|                                         | IT-SR2 | 43.73  | 10.29   | 12   | Italy           | 01/2013 | 12/2014 | 306    |     | [40]         |
|                                         | IT-SRo | 43.73  | 10.28   | 6    | Italy           | 01/1999 | 05/2010 | 933    | x   | [41]         |
|                                         | NL-Loo | 52.17  | 5.74    | 25   | The Netherlands | 07/1996 | 11/2014 | 2345   | x   | [42]         |
|                                         | RU-Fyo | 56.46  | 32.92   | 265  | Russia          | 07/1998 | 12/2014 | 1408   | x   | [43]         |
|                                         | US-Blo | 38.90  | -120.63 | 1315 | USA             | 06/1997 | 10/2007 | 1928   | x   | [44]         |
|                                         | US-GLE | 41.37  | -106.24 | 3197 | USA             | 04/2005 | 12/2014 | 661    | x   | [34]         |
|                                         | US-Me1 | 44.58  | -121.50 | 896  | USA             | 06/2004 | 05/2005 | 140    | x   | [45]         |
|                                         | US-Me2 | 44.45  | -121.56 | 1253 | USA             | 01/2002 | 12/2014 | 2402   |     | [46]         |
|                                         | US-Me4 | 44.50  | -121.62 | 922  | USA             | 02/2000 | 11/2000 | 171    |     | [47]         |
|                                         | US-Me5 | 44.44  | -121.57 | 1188 | USA             | 04/2000 | 12/2002 | 434    | x   | [47]         |
|                                         | US-NR1 | 40.03  | -105.55 | 3050 | USA             | 05/1999 | 12/2014 | 3157   | x   | [48]         |
|                                         | US-Prr | 65.12  | -147.49 | 210  | USA             | 10/2010 | 12/2014 | 225    |     | [49]         |
|                                         | US-Wi4 | 46.74  | -91.17  | 352  | USA             | 05/2002 | 10/2005 | 83     |     | [50]         |
| <i>Mixed Forest (MF)</i>                |        |        |         |      |                 |         |         |        |     |              |
|                                         | AR-SLu | -33.47 | -66.46  | 505  | Argentina       | 12/2009 | 03/2011 | 347    |     | [51]         |
|                                         | BE-Vie | 50.31  | 6.00    | 493  | Belgium         | 08/1996 | 12/2014 | 1847   | x   | [52]         |
|                                         | CA-Gro | 48.22  | -82.16  | 340  | Canada          | 09/2003 | 05/2014 | 848    |     | [53]         |

| Biome                         | Site   | Lat    | Lon     | Alt  | Country      | From    | Until   | # days | SWC | Ref/PI      |
|-------------------------------|--------|--------|---------|------|--------------|---------|---------|--------|-----|-------------|
|                               | US-Syv | 46.24  | -89.35  | 540  | USA          | 09/2001 | 06/2007 | 846    | x   | [54]        |
| <i>Closed Shrubland (CSH)</i> |        |        |         |      |              |         |         |        |     |             |
|                               | IT-Noe | 40.61  | 8.15    | 28   | Italy        | 04/2004 | 10/2014 | 1401   | x   | [55]        |
|                               | US-KS2 | 28.61  | -80.67  | 3    | USA          | 04/2003 | 12/2006 | 603    | x   | [56]        |
| <i>Woody Savannah (WSA)</i>   |        |        |         |      |              |         |         |        |     |             |
|                               | AU-Gin | -31.38 | 115.71  | 51   | Australia    | 10/2011 | 12/2014 | 724    |     | [11]        |
|                               | AU-How | -12.49 | 131.15  | 64   | Australia    | 09/2001 | 12/2014 | 1683   | x   | [10]        |
|                               | AU-RDF | -14.56 | 132.48  | 188  | Australia    | 09/2011 | 07/2013 | 466    | x   | [10]        |
|                               | US-SRM | 31.82  | -110.87 | 1120 | USA          | 01/2004 | 12/2014 | 3313   | x   | [18]        |
|                               | US-Ton | 38.43  | -120.97 | 177  | USA          | 05/2001 | 12/2014 | 3322   | x   | [57]        |
| <i>Savannah (SAV)</i>         |        |        |         |      |              |         |         |        |     |             |
|                               | AU-Cpr | -34.00 | 140.59  | 62   | Australia    | 08/2010 | 12/2014 | 1193   | x   | [11]        |
|                               | AU-DaS | -14.16 | 131.39  | 75   | Australia    | 01/2008 | 12/2014 | 1008   | x   | [10]        |
|                               | AU-Dry | -15.26 | 132.37  | 176  | Australia    | 09/2008 | 12/2014 | 943    |     | [10]        |
|                               | AU-GWW | -30.19 | 120.65  | 449  | Australia    | 01/2013 | 12/2014 | 296    |     | [11]        |
|                               | SD-Dem | 13.28  | 30.48   | 500  | Sudan        | 02/2005 | 11/2009 | 575    |     | [58]        |
|                               | ZA-Kru | -25.02 | 31.50   | 359  | South Africa | 04/2000 | 02/2013 | 1015   | x   | [59]        |
| <i>Open Shrubland (OSH)</i>   |        |        |         |      |              |         |         |        |     |             |
|                               | AU-TTE | -22.29 | 133.64  | 553  | Australia    | 07/2012 | 12/2014 | 647    |     | [60]        |
|                               | CA-SF3 | 54.09  | -106.01 | 540  | Canada       | 04/2001 | 09/2006 | 760    |     | [33]        |
|                               | ES-Amo | 36.83  | -2.25   | 58   | Spain        | 06/2007 | 12/2012 | 1274   | x   | F.D. Poveda |
|                               | US-SRC | 31.91  | -110.84 | 991  | USA          | 03/2008 | 06/2014 | 1382   | x   | [61]        |
|                               | US-Whs | 31.74  | -110.05 | 1370 | USA          | 06/2007 | 12/2014 | 2373   | x   | [62]        |
|                               | US-Wi6 | 46.63  | -91.30  | 371  | USA          | 05/2002 | 10/2003 | 81     |     | [50]        |
| <i>Wetland (WET)</i>          |        |        |         |      |              |         |         |        |     |             |
|                               | DE-SfN | 47.81  | 11.33   | 590  | Germany      | 07/2012 | 12/2014 | 252    |     | [63]        |
|                               | US-Atq | 70.47  | -157.41 | 15   | USA          | 04/2003 | 09/2008 | 445    |     | [64]        |
|                               | US-Ivo | 68.49  | -155.75 | 568  | USA          | 01/2004 | 10/2007 | 230    |     | [64]        |
|                               | US-Los | 46.08  | -89.98  | 480  | USA          | 09/2000 | 12/2010 | 1459   |     | [65]        |
|                               | US-Tw4 | 38.10  | -121.64 | -5   | USA          | 11/2013 | 12/2014 | 245    |     | [66]        |

**Table S2** Percentage of the sites for which the mean, standard deviation, 2<sup>nd</sup> percentile and 98<sup>th</sup> percentile was representative ( $p<0.05$ ) for the climate forcing conditions, for the sampling based on the energy balance criterion ( $n=107$ ) and the soil moisture criterion ( $n=62$ ).

|                             | <i>Energy balance criterion</i> |                  |     |      | <i>Soil moisture criterion</i> |                  |     |      |
|-----------------------------|---------------------------------|------------------|-----|------|--------------------------------|------------------|-----|------|
|                             | SW <sub>in</sub>                | T <sub>air</sub> | VPD | Wind | SW <sub>in</sub>               | T <sub>air</sub> | VPD | Wind |
| Mean                        | 100                             | 100              | 97  | 99   | 100                            | 100              | 97  | 98   |
| Standard Deviation          | 98                              | 99               | 99  | 95   | 100                            | 95               | 100 | 98   |
| 2 <sup>nd</sup> percentile  | 97                              | 96               | 98  | 98   | 100                            | 95               | 100 | 100  |
| 98 <sup>th</sup> percentile | 100                             | 94               | 99  | 99   | 97                             | 94               | 100 | 97   |

5 **Table S3.** Mean correlations per biome between the measured  $E_{unstr}$  and the different  $E_p$  methods. The methods with the highest correlation per biome are highlighted in bold and underlined. Based on unstressed days only defined using the soil moisture criterion.

|              | <i>Radiation, Temperature, VPD</i> |                    |             |               |             | <i>Radiation, Temperature</i> |                    |                    | <i>Radiation</i>       |                    |                    | <i>Thornthwaite</i> |             | <i>Temperature</i> |             | <i>Hargreaves-Samani</i> |             |
|--------------|------------------------------------|--------------------|-------------|---------------|-------------|-------------------------------|--------------------|--------------------|------------------------|--------------------|--------------------|---------------------|-------------|--------------------|-------------|--------------------------|-------------|
|              | <i>Penman-Monteith</i>             |                    |             | <i>Penman</i> |             | <i>Priestley and Taylor</i>   |                    |                    | <i>Milly and Dunne</i> |                    |                    | <i>Thornthwaite</i> |             | <i>Oudin</i>       |             | <i>Hargreaves-Samani</i> |             |
|              | Ref. crop                          | Standard           | Biome       | Ref. crop     | Standard    | Ref. crop                     | Standard           | Biome              | Ref. crop              | Standard           | Biome              | Standard            | Biome       | Standard           | Biome       | Standard                 | Biome       |
| CRO (5)      | 0.73                               | 0.80               | 0.79        | 0.69          | 0.77        | 0.74                          | <b><u>0.85</u></b> | <b><u>0.85</u></b> | 0.68                   | 0.85               | 0.85               | 0.68                | 0.68        | 0.69               | 0.69        | 0.71                     | 0.71        |
| GRA (15)     | 0.62                               | 0.79               | 0.79        | 0.50          | 0.73        | 0.69                          | <b><u>0.88</u></b> | <b><u>0.88</u></b> | 0.56                   | 0.87               | 0.87               | 0.66                | 0.66        | 0.66               | 0.66        | 0.69                     | 0.69        |
| DBF (8)      | 0.74                               | 0.85               | 0.85        | 0.70          | 0.72        | 0.74                          | <b><u>0.87</u></b> | <b><u>0.87</u></b> | 0.58                   | 0.81               | 0.81               | 0.78                | 0.77        | 0.80               | 0.80        | 0.79                     | 0.79        |
| EBF (3)      | 0.71                               | 0.82               | 0.82        | 0.71          | 0.80        | 0.71                          | <b><u>0.83</u></b> | <b><u>0.83</u></b> | 0.64                   | 0.80               | 0.80               | 0.66                | 0.66        | 0.60               | 0.60        | 0.63                     | 0.63        |
| ENF (18)     | 0.68                               | 0.77               | 0.77        | 0.65          | 0.72        | 0.70                          | <b><u>0.81</u></b> | <b><u>0.81</u></b> | 0.56                   | 0.74               | 0.74               | 0.77                | 0.77        | 0.76               | 0.76        | 0.77                     | 0.77        |
| MF (2)       | 0.65                               | 0.73               | 0.73        | 0.63          | 0.71        | 0.68                          | 0.78               | 0.78               | 0.58                   | 0.75               | 0.75               | <b><u>0.80</u></b>  | 0.80        | 0.75               | 0.75        | 0.76                     | 0.76        |
| CSH (2)      | 0.82                               | <b><u>0.85</u></b> | 0.83        | 0.80          | 0.81        | 0.77                          | 0.81               | 0.81               | 0.73                   | 0.83               | 0.83               | 0.46                | 0.49        | 0.48               | 0.48        | 0.52                     | 0.52        |
| WSA (3)      | 0.60                               | 0.74               | 0.76        | 0.50          | 0.57        | 0.65                          | <b><u>0.86</u></b> | <b><u>0.86</u></b> | 0.54                   | 0.84               | 0.84               | 0.65                | 0.66        | 0.65               | 0.65        | 0.70                     | 0.70        |
| SAV (3)      | 0.57                               | 0.68               | 0.64        | 0.58          | 0.72        | 0.59                          | 0.77               | 0.77               | 0.57                   | <b><u>0.78</u></b> | <b><u>0.78</u></b> | 0.45                | 0.45        | 0.42               | 0.42        | 0.50                     | 0.50        |
| OSH (3)      | 0.58                               | 0.80               | 0.85        | 0.35          | 0.66        | 0.64                          | <b><u>0.86</u></b> | <b><u>0.86</u></b> | 0.46                   | 0.84               | 0.84               | 0.68                | 0.73        | 0.73               | 0.73        | 0.72                     | 0.72        |
| Overall (62) | <b>0.67</b>                        | <b>0.78</b>        | <b>0.78</b> | <b>0.61</b>   | <b>0.72</b> | <b>0.70</b>                   | <b><u>0.84</u></b> | <b><u>0.84</u></b> | <b>0.58</b>            | <b>0.81</b>        | <b>0.81</b>        | <b>0.69</b>         | <b>0.69</b> | <b>0.70</b>        | <b>0.70</b> | <b>0.71</b>              | <b>0.71</b> |

**Table S4.** Unbiased Root Mean Square Error (UnRMSE) (in mm day<sup>-1</sup>) for the  $E_p$  methods per biome. The methods with the lowest UnRMSE per biome are indicated in bold and are underlined. Based on unstressed days only defined using the soil moisture criterion.

|              | Radiation, Temperature, VPD |             |             |             |             |  | Radiation, Temperature |             |                    | Radiation       |             |                    | Thornthwaite       |                    | Temperature |             | Hargreaves-Samani |             |
|--------------|-----------------------------|-------------|-------------|-------------|-------------|--|------------------------|-------------|--------------------|-----------------|-------------|--------------------|--------------------|--------------------|-------------|-------------|-------------------|-------------|
|              | Penman-Monteith             |             |             | Penman      |             |  | Priestley and Taylor   |             |                    | Milly and Dunne |             |                    |                    |                    | Oudin       |             |                   |             |
|              | Ref. crop                   | Standard    | Biome       | Ref. crop   | Standard    |  | Ref. crop              | Standard    | Biome              | Ref. crop       | Standard    | Biome              | Standard           | Biome              | Standard    | Biome       | Standard          | Biome       |
| CRO (5)      | 1.30                        | 1.03        | 1.25        | 1.77        | 1.65        |  | 1.57                   | 1.00        | 0.85               | 1.44            | 0.86        | <b><u>0.84</u></b> | 1.24               | 1.24               | 1.21        | 1.18        | 1.16              | 1.16        |
| GRA (15)     | 1.55                        | 0.91        | 0.89        | 2.27        | 1.27        |  | 1.65                   | 0.76        | <b><u>0.74</u></b> | 1.62            | 0.74        | 0.85               | 1.02               | 1.07               | 1.00        | 0.99        | 1.02              | 1.00        |
| DBF (8)      | 1.52                        | 1.20        | 1.19        | 1.77        | 2.20        |  | 1.74                   | 1.17        | 1.26               | 2.01            | 1.32        | 1.53               | 1.15               | <b><u>1.14</u></b> | 1.35        | 1.43        | 1.44              | 1.48        |
| EBF (3)      | 0.89                        | 0.65        | 0.67        | 1.10        | 0.91        |  | 1.06                   | 0.84        | <b><u>0.59</u></b> | 1.03            | 0.77        | 0.62               | 0.73               | 0.72               | 0.71        | 0.76        | 0.68              | 0.77        |
| ENF (18)     | 1.30                        | 1.08        | 0.98        | 1.63        | 2.19        |  | 1.60                   | 1.18        | <b><u>0.73</u></b> | 1.64            | 1.10        | 0.85               | 0.86               | 0.86               | 0.84        | 0.83        | 0.86              | 0.85        |
| MF (2)       | 1.59                        | 1.21        | 1.05        | 1.83        | 1.57        |  | 1.89                   | 1.25        | 0.92               | 1.67            | 1.12        | 1.03               | <b><u>0.72</u></b> | 0.73               | 0.94        | 0.94        | 0.92              | 0.92        |
| CSH (2)      | 0.73                        | 0.60        | 0.56        | 0.95        | 0.98        |  | 1.16                   | 0.90        | <b><u>0.54</u></b> | 1.13            | 0.78        | 0.55               | 0.94               | 0.97               | 0.82        | 0.73        | 0.74              | 0.72        |
| WSA (3)      | 1.25                        | 0.84        | 0.74        | 1.63        | 1.95        |  | 1.42                   | 0.70        | <b><u>0.58</u></b> | 1.40            | 0.64        | 0.65               | 0.89               | 0.89               | 0.81        | 0.79        | 0.74              | 0.73        |
| SAV (3)      | 1.33                        | 0.94        | 0.80        | 1.67        | 1.66        |  | 1.56                   | 0.84        | <b><u>0.57</u></b> | 1.31            | 0.67        | 0.57               | 0.97               | 0.94               | 0.98        | 0.87        | 0.97              | 0.87        |
| OSH (3)      | 1.35                        | 0.69        | 0.54        | 2.16        | 1.06        |  | 1.57                   | 0.62        | <b><u>0.53</u></b> | 1.55            | 0.55        | 0.63               | 1.03               | 1.00               | 0.74        | 0.63        | 0.73              | 0.65        |
| Overall (62) | <b>1.36</b>                 | <b>0.98</b> | <b>0.94</b> | <b>1.80</b> | <b>1.71</b> |  | <b>1.58</b>            | <b>0.97</b> | <b><u>0.78</u></b> | <b>1.59</b>     | <b>0.93</b> | <b>0.89</b>        | <b>0.96</b>        | <b>0.97</b>        | <b>0.97</b> | <b>0.96</b> | <b>0.98</b>       | <b>0.97</b> |

5 **Table S5.** Mean bias (in mm day<sup>-1</sup>) for the  $E_p$  methods per biome. The best performing method per biome is indicated in bold and is underlined. Based on unstressed days only defined using the soil moisture criterion.

|              | Radiation, Temperature, VPD |             |                    |             |             |  | Radiation, Temperature |             |                    | Radiation       |             |                     | Thornthwaite |                    | Temperature         |                    | Hargreaves-Samani |                    |
|--------------|-----------------------------|-------------|--------------------|-------------|-------------|--|------------------------|-------------|--------------------|-----------------|-------------|---------------------|--------------|--------------------|---------------------|--------------------|-------------------|--------------------|
|              | Penman-Monteith             |             |                    | Penman      |             |  | Priestley and Taylor   |             |                    | Milly and Dunne |             |                     |              |                    | Oudin               |                    |                   |                    |
|              | Ref. crop                   | Standard    | Biome              | Ref. crop   | Standard    |  | Ref. crop              | Standard    | Biome              | Ref. crop       | Standard    | Biome               | Standard     | Biome              | Standard            | Biome              | Standard          | Biome              |
| CRO (5)      | 2.07                        | 0.50        | 1.15               | 3.83        | 1.83        |  | 2.93                   | 1.02        | 0.08               | 3.03            | 0.90        | <b><u>0.08</u></b>  | 0.28         | 0.38               | -0.33               | -0.48              | 0.15              | 0.19               |
| GRA (15)     | 3.08                        | 0.98        | 0.82               | 4.89        | 2.16        |  | 4.06                   | 1.41        | -0.03              | 3.91            | 1.15        | -0.13               | 0.21         | 0.48               | 0.11                | -0.55              | 0.74              | <b><u>0.01</u></b> |
| DBF (8)      | 1.92                        | 0.84        | 0.60               | 2.96        | 4.15        |  | 3.14                   | 2.13        | -0.22              | 3.37            | 2.09        | -0.35               | -0.10        | <b><u>0.02</u></b> | -0.44               | -0.83              | 0.10              | -0.16              |
| EBF (3)      | 1.61                        | 0.37        | 0.62               | 2.60        | 1.81        |  | 3.06                   | 1.85        | 0.08               | 2.94            | 1.57        | -0.02               | -1.36        | -0.74              | -1.06               | <b><u>0.00</u></b> | -0.92             | 0.43               |
| ENF (18)     | 2.70                        | 1.45        | 0.97               | 3.95        | 4.75        |  | 3.92                   | 2.62        | <b><u>0.03</u></b> | 4.28            | 2.71        | -0.04               | 0.36         | 0.45               | -0.50               | -0.52              | 0.29              | 0.13               |
| MF (2)       | 3.17                        | 1.68        | 0.57               | 4.51        | 3.36        |  | 4.58                   | 2.51        | -0.04              | 5.04            | 2.60        | -0.15               | 1.03         | 1.01               | <b><u>0.01</u></b>  | -0.55              | 0.84              | 0.05               |
| CSH (2)      | 1.93                        | 0.85        | 0.04               | 2.87        | 2.35        |  | 2.74                   | 1.62        | -0.05              | 2.49            | 1.30        | -0.08               | -0.41        | -0.14              | <b><u>-0.03</u></b> | -0.37              | 0.04              | -0.05              |
| WSA (3)      | 2.64                        | 1.09        | <b><u>0.13</u></b> | 3.54        | 3.97        |  | 3.59                   | 1.51        | -0.21              | 3.32            | 1.13        | -0.32               | -0.25        | 0.21               | 0.14                | -0.42              | 0.29              | -0.19              |
| SAV (3)      | 2.66                        | 1.30        | 0.19               | 3.55        | 3.26        |  | 3.48                   | 1.54        | -0.14              | 2.82            | 0.96        | <b><u>-0.10</u></b> | 0.56         | 0.53               | 1.15                | -0.62              | 1.07              | -0.21              |
| OSH (3)      | 3.94                        | 1.40        | 0.14               | 5.54        | 2.49        |  | 4.64                   | 1.39        | <b><u>0.01</u></b> | 4.52            | 1.19        | -0.12               | 0.32         | 0.69               | 0.63                | -0.28              | 1.11              | -0.02              |
| Overall (62) | <b>2.64</b>                 | <b>1.09</b> | <b>0.72</b>        | <b>4.00</b> | <b>3.33</b> |  | <b>3.71</b>            | <b>1.89</b> | <b>-0.04</b>       | <b>3.77</b>     | <b>1.77</b> | <b>-0.12</b>        | <b>0.12</b>  | <b>0.33</b>        | <b>-0.16</b>        | <b>-0.52</b>       | <b>0.39</b>       | <b><u>0.04</u></b> |

**Table S6.** Mean correlations per biome between the measured  $E_{\text{unstr}}$  and the different  $E_p$  methods. The methods with the highest correlation per biome are highlighted in bold and underlined. Based on unstressed days only defined using the energy balance criterion, but only for the sites for which soil moisture data were available.

|              | Radiation, Temperature, VPD |             |             |             |             |  | Radiation, Temperature |                    |                    | Radiation       |                    |                    | Thornthwaite |             | Temperature |             | Hargreaves-Samani |             |
|--------------|-----------------------------|-------------|-------------|-------------|-------------|--|------------------------|--------------------|--------------------|-----------------|--------------------|--------------------|--------------|-------------|-------------|-------------|-------------------|-------------|
|              | Penman-Monteith             |             |             | Penman      |             |  | Priestley and Taylor   |                    |                    | Milly and Dunne |                    |                    |              |             | Oudin       |             |                   |             |
|              | Ref. crop                   | Standard    | Biome       | Ref. crop   | Standard    |  | Ref. crop              | Standard           | Biome              | Ref. crop       | Standard           | Biome              | Standard     | Biome       | Standard    | Biome       | Standard          | Biome       |
| CRO (5)      | 0.86                        | 0.93        | 0.94        | 0.75        | 0.93        |  | 0.88                   | 0.96               | 0.96               | 0.86            | <b><u>0.96</u></b> | <b><u>0.96</u></b> | 0.79         | 0.79        | 0.78        | 0.78        | 0.82              | 0.82        |
| GRA (15)     | 0.77                        | 0.86        | 0.86        | 0.74        | 0.83        |  | 0.80                   | 0.93               | 0.93               | 0.77            | <b><u>0.93</u></b> | <b><u>0.93</u></b> | 0.53         | 0.52        | 0.55        | 0.55        | 0.62              | 0.62        |
| DBF (8)      | 0.79                        | 0.86        | 0.88        | 0.80        | 0.86        |  | 0.78                   | <b><u>0.89</u></b> | <b><u>0.89</u></b> | 0.75            | 0.89               | 0.89               | 0.53         | 0.52        | 0.53        | 0.53        | 0.59              | 0.59        |
| EBF (3)      | 0.94                        | 0.98        | 0.97        | 0.94        | 0.97        |  | 0.93                   | <b><u>0.98</u></b> | <b><u>0.98</u></b> | 0.89            | 0.98               | 0.98               | 0.83         | 0.88        | 0.81        | 0.81        | 0.86              | 0.86        |
| ENF (18)     | 0.88                        | 0.88        | 0.89        | 0.87        | 0.88        |  | 0.90                   | 0.94               | 0.94               | 0.87            | <b><u>0.95</u></b> | <b><u>0.95</u></b> | 0.69         | 0.71        | 0.75        | 0.75        | 0.82              | 0.82        |
| MF (2)       | 0.89                        | 0.93        | 0.92        | 0.89        | 0.94        |  | 0.89                   | <b><u>0.94</u></b> | <b><u>0.94</u></b> | 0.88            | 0.93               | 0.93               | 0.77         | 0.76        | 0.73        | 0.73        | 0.79              | 0.79        |
| CSH (2)      | 0.90                        | 0.94        | 0.93        | 0.89        | 0.90        |  | 0.90                   | 0.95               | 0.95               | 0.89            | <b><u>0.95</u></b> | <b><u>0.95</u></b> | 0.80         | 0.78        | 0.75        | 0.75        | 0.79              | 0.79        |
| WSA (3)      | 0.75                        | 0.74        | 0.73        | 0.73        | 0.71        |  | 0.78                   | 0.88               | 0.88               | 0.78            | <b><u>0.88</u></b> | <b><u>0.88</u></b> | 0.52         | 0.51        | 0.48        | 0.48        | 0.50              | 0.50        |
| SAV (3)      | 0.77                        | 0.77        | 0.76        | 0.75        | 0.74        |  | 0.84                   | 0.93               | 0.93               | 0.82            | <b><u>0.93</u></b> | <b><u>0.93</u></b> | 0.53         | 0.52        | 0.56        | 0.56        | 0.66              | 0.66        |
| OSH (3)      | 0.69                        | 0.75        | 0.77        | 0.62        | 0.70        |  | 0.79                   | 0.91               | 0.91               | 0.78            | <b><u>0.92</u></b> | <b><u>0.92</u></b> | 0.48         | 0.45        | 0.54        | 0.54        | 0.64              | 0.64        |
| Overall (62) | <b>0.82</b>                 | <b>0.87</b> | <b>0.87</b> | <b>0.80</b> | <b>0.85</b> |  | <b>0.84</b>            | <b>0.93</b>        | <b>0.93</b>        | <b>0.82</b>     | <b><u>0.93</u></b> | <b><u>0.93</u></b> | <b>0.61</b>  | <b>0.61</b> | <b>0.65</b> | <b>0.65</b> | <b>0.71</b>       | <b>0.71</b> |

5 **Table S7.** Unbiased Root Mean Square Error (UnRMSE) (in mm day<sup>-1</sup>) for the  $E_p$  methods per biome. The methods with the lowest UnRMSE per biome are indicated in bold and are underlined. Based on unstressed days only defined using the energy balance criterion, but only for the sites for which soil moisture data were available.

|              | Radiation, Temperature, VPD |             |             |             |             |  | Radiation, Temperature |          |                    | Radiation       |                    |                    | Thornthwaite |             | Temperature |             | Hargreaves-Samani |             |
|--------------|-----------------------------|-------------|-------------|-------------|-------------|--|------------------------|----------|--------------------|-----------------|--------------------|--------------------|--------------|-------------|-------------|-------------|-------------------|-------------|
|              | Penman-Monteith             |             |             | Penman      |             |  | Priestley and Taylor   |          |                    | Milly and Dunne |                    |                    |              |             | Oudin       |             |                   |             |
|              | Ref. crop                   | Standard    | Biome       | Ref. crop   | Standard    |  | Ref. crop              | Standard | Biome              | Ref. crop       | Standard           | Biome              | Standard     | Biome       | Standard    | Biome       | Standard          | Biome       |
| CRO (5)      | 1.15                        | 0.86        | 0.93        | 1.66        | 1.32        |  | 1.23                   | 0.73     | 0.69               | 1.22            | 0.71               | <b><u>0.67</u></b> | 1.42         | 1.42        | 1.53        | 1.42        | 1.37              | 1.34        |
| GRA (15)     | 1.20                        | 0.70        | 0.81        | 1.77        | 1.05        |  | 1.28                   | 0.54     | 0.46               | 1.07            | <b><u>0.44</u></b> | 0.45               | 1.10         | 1.06        | 1.02        | 1.02        | 0.98              | 0.98        |
| DBF (8)      | 1.04                        | 0.84        | 0.83        | 1.09        | 1.25        |  | 1.20                   | 0.79     | <b><u>0.75</u></b> | 1.13            | 0.77               | 0.77               | 1.38         | 1.38        | 1.37        | 1.34        | 1.34              | 1.32        |
| EBF (3)      | 0.85                        | 0.51        | 0.74        | 1.09        | 0.99        |  | 1.22                   | 0.75     | 0.49               | 1.05            | 0.44               | <b><u>0.44</u></b> | 1.16         | 1.05        | 1.25        | 1.23        | 1.11              | 1.02        |
| ENF (18)     | 1.03                        | 0.82        | 0.96        | 1.24        | 1.60        |  | 1.30                   | 0.86     | 0.55               | 1.10            | 0.62               | <b><u>0.53</u></b> | 1.07         | 1.06        | 1.00        | 1.01        | 0.92              | 0.94        |
| MF (2)       | 0.92                        | 0.61        | 0.61        | 1.17        | 0.89        |  | 1.26                   | 0.72     | <b><u>0.52</u></b> | 0.95            | 0.58               | 0.57               | 0.95         | 0.93        | 0.96        | 1.01        | 0.89              | 0.89        |
| CSH (2)      | 0.82                        | 0.59        | 0.59        | 0.98        | 0.92        |  | 1.12                   | 0.75     | <b><u>0.48</u></b> | 0.91            | 0.55               | 0.49               | 0.90         | 0.96        | 0.83        | 0.81        | 0.91              | 0.87        |
| WSA (3)      | 1.28                        | 1.10        | 0.97        | 1.48        | 1.98        |  | 1.51                   | 0.81     | 0.62               | 1.16            | 0.63               | <b><u>0.60</u></b> | 1.11         | 1.11        | 1.06        | 1.06        | 1.03              | 1.03        |
| SAV (3)      | 1.16                        | 1.01        | 0.86        | 1.44        | 1.75        |  | 1.33                   | 0.71     | <b><u>0.45</u></b> | 1.05            | 0.52               | 0.46               | 1.21         | 1.20        | 1.07        | 0.97        | 1.08              | 0.99        |
| OSH (3)      | 1.38                        | 0.75        | 0.53        | 1.89        | 1.08        |  | 1.69                   | 0.57     | 0.31               | 1.32            | 0.36               | <b><u>0.28</u></b> | 1.14         | 1.02        | 0.77        | 0.61        | 0.79              | 0.59        |
| Overall (62) | <b>1.10</b>                 | <b>0.79</b> | <b>0.85</b> | <b>1.42</b> | <b>1.33</b> |  | <b>1.30</b>            | 0.73     | 0.55               | <b>1.10</b>     | <b>0.57</b>        | <b><u>0.54</u></b> | <b>1.17</b>  | <b>1.15</b> | <b>1.10</b> | <b>1.07</b> | <b>1.04</b>       | <b>1.02</b> |



**Table S8.** Mean bias (in mm day<sup>-1</sup>) for the  $E_p$  methods per biome. The best performing method per biome is indicated in bold and is underlined. Based on unstressed days only defined using the energy balance criterion, but only for the sites for which soil moisture data were available.

|              | Radiation, Temperature, VPD |                     |                    |           |          |  | Radiation, Temperature |          |                     | Radiation       |          |                    | Thornthwaite |       | Temperature |       | Hargreaves-Samani |                    |
|--------------|-----------------------------|---------------------|--------------------|-----------|----------|--|------------------------|----------|---------------------|-----------------|----------|--------------------|--------------|-------|-------------|-------|-------------------|--------------------|
|              | Penman-Monteith             |                     |                    | Penman    |          |  | Priestley and Taylor   |          |                     | Milly and Dunne |          |                    |              |       | Oudin       |       |                   |                    |
|              | Ref. crop                   | Standard            | Biome              | Ref. crop | Standard |  | Ref. crop              | Standard | Biome               | Ref. crop       | Standard | Biome              | Standard     | Biome | Standard    | Biome | Standard          | Biome              |
| CRO (5)      | 1.09                        | -0.40               | 0.62               | 3.07      | 1.56     |  | 2.06                   | 0.40     | -0.06               | 1.50            | -0.17    | 0.20               | -0.78        | -0.72 | -1.68       | -0.74 | -1.03             | <b><u>0.05</u></b> |
| GRA (15)     | 2.67                        | 0.52                | 1.21               | 4.50      | 2.03     |  | 3.69                   | 1.07     | <b><u>-0.06</u></b> | 2.50            | 0.14     | -0.20              | -0.32        | -0.58 | -0.70       | -0.83 | -0.12             | -0.08              |
| DBF (8)      | 0.17                        | -0.62               | 0.66               | 1.02      | 2.31     |  | 1.69                   | 1.02     | <b><u>0.03</u></b>  | 0.60            | -0.08    | -0.10              | -1.96        | -2.07 | -2.26       | -0.51 | -2.11             | -0.05              |
| EBF (3)      | 0.76                        | <b><u>-0.07</u></b> | 0.69               | 1.59      | 1.23     |  | 1.58                   | 0.93     | 0.20                | 0.88            | 0.21     | -0.14              | -1.25        | -0.76 | -0.96       | -0.79 | -1.30             | -0.21              |
| ENF (18)     | 1.28                        | 0.40                | 1.11               | 2.05      | 2.66     |  | 2.05                   | 1.20     | <b><u>-0.04</u></b> | 1.83            | 0.91     | 0.02               | -0.54        | -0.39 | -0.80       | -0.61 | -0.44             | 0.10               |
| MF (2)       | 1.51                        | 0.49                | <b><u>0.15</u></b> | 2.45      | 1.75     |  | 2.61                   | 1.28     | -0.28               | 2.01            | 0.74     | -0.20              | 0.36         | -0.03 | -0.52       | -1.44 | -0.40             | -0.53              |
| CSH (2)      | 1.01                        | 0.49                | <b><u>0.00</u></b> | 1.61      | 1.79     |  | 1.46                   | 1.10     | -0.04               | 0.92            | 0.51     | -0.14              | 0.18         | 0.39  | 0.14        | -0.56 | 0.18              | -0.18              |
| WSA (3)      | 2.43                        | 1.26                | <b><u>0.01</u></b> | 3.28      | 4.92     |  | 3.71                   | 1.59     | -0.04               | 2.33            | 0.46     | -0.24              | -0.30        | -0.42 | -0.56       | -0.76 | -0.30             | -0.40              |
| SAV (3)      | 2.24                        | 1.22                | 0.26               | 3.10      | 3.50     |  | 3.04                   | 1.51     | -0.06               | 2.05            | 0.65     | <b><u>0.00</u></b> | 0.15         | 0.11  | 0.53        | -0.77 | 0.66              | -0.10              |
| OSH (3)      | 4.11                        | 1.59                | 0.26               | 5.50      | 2.78     |  | 4.85                   | 1.50     | <b><u>0.03</u></b>  | 3.85            | 0.84     | -0.05              | 1.15         | 0.78  | 1.00        | -0.10 | 1.47              | 0.28               |
| Overall (62) | 1.67                        | 0.35                | 0.82               | 2.85      | 2.40     |  | 2.64                   | 1.11     | <b><u>-0.03</u></b> | 1.87            | 0.42     | -0.07              | -0.52        | -0.61 | -0.84       | -0.69 | -0.49             | -0.03              |

5 **Table S9.** Mean correlations per biome between the measured  $E_{unstr}$  and the different  $E_p$  methods. The methods with the highest correlation per biome are highlighted in bold and underlined. Based on unstressed days only defined using the energy balance criterion. The data are calculated from validation datasets of 1/3<sup>rd</sup> of the sites per biome, calibration datasets comprising 2/3<sup>rd</sup> of the sites per biome were used to calibrate the key parameters. This process was repeated 100 times, and the mean correlation per biome of the 100 repetitions is given. The number between brackets of each biome is the number of validation sites used per repetition.

|              | Radiation, Temperature, VPD |          |       |           |          |  | Radiation, Temperature |                    |                    | Radiation       |                    |                    | Thornthwaite |       | Temperature |       | Hargreaves-Samani |       |
|--------------|-----------------------------|----------|-------|-----------|----------|--|------------------------|--------------------|--------------------|-----------------|--------------------|--------------------|--------------|-------|-------------|-------|-------------------|-------|
|              | Penman-Monteith             |          |       | Penman    |          |  | Priestley and Taylor   |                    |                    | Milly and Dunne |                    |                    |              |       | Oudin       |       |                   |       |
|              | Ref. crop                   | Standard | Biome | Ref. crop | Standard |  | Ref. crop              | Standard           | Biome              | Ref. crop       | Standard           | Biome              | Standard     | Biome | Standard    | Biome | Standard          | Biome |
| CRO (4)      | 0.84                        | 0.91     | 0.89  | 0.75      | 0.80     |  | 0.86                   | 0.96               | 0.96               | 0.82            | <b><u>0.96</u></b> | <b><u>0.96</u></b> | 0.77         | 0.77  | 0.73        | 0.73  | 0.76              | 0.76  |
| GRA (7)      | 0.80                        | 0.88     | 0.87  | 0.78      | 0.85     |  | 0.83                   | 0.93               | 0.93               | 0.80            | <b><u>0.94</u></b> | <b><u>0.94</u></b> | 0.55         | 0.33  | 0.56        | 0.56  | 0.67              | 0.67  |
| DBF (5)      | 0.78                        | 0.86     | 0.87  | 0.79      | 0.84     |  | 0.77                   | 0.91               | 0.91               | 0.75            | <b><u>0.91</u></b> | <b><u>0.91</u></b> | 0.56         | 0.55  | 0.56        | 0.56  | 0.61              | 0.61  |
| EBF (3)      | 0.88                        | 0.89     | 0.87  | 0.86      | 0.84     |  | 0.87                   | <b><u>0.91</u></b> | <b><u>0.91</u></b> | 0.83            | 0.90               | 0.90               | 0.73         | 0.80  | 0.59        | 0.59  | 0.76              | 0.76  |
| ENF (9)      | 0.89                        | 0.90     | 0.91  | 0.88      | 0.85     |  | 0.90                   | 0.95               | 0.95               | 0.87            | <b><u>0.95</u></b> | <b><u>0.95</u></b> | 0.76         | 0.78  | 0.76        | 0.76  | 0.82              | 0.82  |
| MF (2)       | 0.90                        | 0.93     | 0.92  | 0.90      | 0.93     |  | 0.90                   | <b><u>0.94</u></b> | <b><u>0.94</u></b> | 0.88            | 0.93               | 0.93               | 0.79         | 0.76  | 0.75        | 0.75  | 0.80              | 0.80  |
| CSH (1)      | 0.90                        | 0.94     | 0.93  | 0.88      | 0.91     |  | 0.89                   | 0.95               | 0.95               | 0.88            | <b><u>0.95</u></b> | <b><u>0.95</u></b> | 0.80         | 0.77  | 0.76        | 0.76  | 0.79              | 0.79  |
| WSA (2)      | 0.76                        | 0.79     | 0.77  | 0.73      | 0.74     |  | 0.80                   | 0.90               | 0.90               | 0.79            | <b><u>0.90</u></b> | <b><u>0.90</u></b> | 0.41         | 0.39  | 0.46        | 0.46  | 0.51              | 0.51  |
| SAV (2)      | 0.79                        | 0.81     | 0.80  | 0.76      | 0.79     |  | 0.83                   | <b><u>0.91</u></b> | <b><u>0.91</u></b> | 0.81            | 0.91               | 0.91               | 0.53         | 0.53  | 0.57        | 0.57  | 0.72              | 0.72  |
| OSH (2)      | 0.71                        | 0.80     | 0.77  | 0.62      | 0.78     |  | 0.78                   | 0.89               | 0.89               | 0.77            | <b><u>0.90</u></b> | <b><u>0.90</u></b> | 0.55         | 0.54  | 0.56        | 0.56  | 0.64              | 0.64  |
| WET (2)      | <b><u>0.87</u></b>          | 0.79     | 0.69  | 0.87      | 0.60     |  | 0.78                   | 0.82               | 0.82               | 0.67            | 0.83               | 0.83               | 0.43         | 0.38  | 0.58        | 0.58  | 0.62              | 0.62  |
| Overall (39) | 0.83                        | 0.86     | 0.85  | 0.80      | 0.81     |  | 0.84                   | 0.91               | 0.91               | 0.81            | <b><u>0.92</u></b> | <b><u>0.92</u></b> | 0.63         | 0.60  | 0.63        | 0.63  | 0.70              | 0.70  |

**Table S10.** Unbiased Root Mean Square Error (UnRMSE) (in mm day<sup>-1</sup>) for the  $E_p$  methods per biome. The methods with the lowest UnRMSE per biome are indicated in bold and are underlined. Based on the validation dataset and on unstressed days only defined using the energy balance criterion (See Table S9 for details).

|              | Radiation, Temperature, VPD |             |             |             |             |  | Radiation, Temperature |             |                    | Radiation       |                    |                    | Thornthwaite |             | Temperature |             | Hargreaves-Samani |             |
|--------------|-----------------------------|-------------|-------------|-------------|-------------|--|------------------------|-------------|--------------------|-----------------|--------------------|--------------------|--------------|-------------|-------------|-------------|-------------------|-------------|
|              | Penman-Monteith             |             |             | Penman      |             |  | Priestley and Taylor   |             |                    | Milly and Dunne |                    |                    |              |             |             |             |                   |             |
|              | Ref. crop                   | Standard    | Biome       | Ref. crop   | Standard    |  | Ref. crop              | Standard    | Biome              | Ref. crop       | Standard           | Biome              |              |             |             |             |                   |             |
| CRO (4)      | 1.17                        | 0.79        | 1.07        | 1.62        | 2.98        |  | 1.29                   | 0.63        | 0.59               | 1.22            | 0.56               | <b><u>0.55</u></b> | 1.24         | 1.23        | 1.28        | 1.30        | 1.24              | 1.31        |
| GRA (7)      | 1.24                        | 0.71        | 0.83        | 1.79        | 1.06        |  | 1.41                   | 0.59        | 0.47               | 1.14            | <b><u>0.45</u></b> | 0.45               | 1.08         | 40.22       | 1.05        | 1.05        | 0.98              | 0.99        |
| DBF (5)      | 1.14                        | 0.88        | 0.90        | 1.21        | 1.37        |  | 1.29                   | 0.75        | 0.72               | 1.19            | 0.72               | <b><u>0.73</u></b> | 1.40         | 1.41        | 1.37        | 1.33        | 1.32              | 1.33        |
| EBF (3)      | 0.85                        | 0.63        | 0.95        | 1.08        | 1.37        |  | 1.10                   | 0.76        | 0.60               | 0.97            | 0.57               | <b><u>0.56</u></b> | 1.02         | 0.97        | 1.13        | 1.13        | 0.99              | 1.03        |
| ENF (9)      | 0.99                        | 0.79        | 1.01        | 1.20        | 15.45       |  | 1.27                   | 0.84        | 0.52               | 1.09            | 0.59               | <b><u>0.50</u></b> | 0.93         | 0.90        | 0.95        | 0.96        | 0.87              | 0.91        |
| MF (2)       | 1.25                        | 0.69        | 0.74        | 1.61        | 1.07        |  | 1.66                   | 0.86        | 0.66               | 1.28            | 0.65               | <b><u>0.64</u></b> | 1.10         | 1.04        | 1.01        | 1.10        | 1.03              | 1.14        |
| CSH (1)      | 0.85                        | 0.59        | 0.65        | 1.01        | 0.88        |  | 1.15                   | 0.76        | <b><u>0.53</u></b> | 0.95            | 0.55               | 0.61               | 0.88         | 0.91        | 0.79        | 0.82        | 0.89              | 0.99        |
| WSA (2)      | 1.13                        | 0.92        | 0.81        | 1.39        | 1.66        |  | 1.25                   | 0.67        | 0.53               | 0.99            | 0.53               | <b><u>0.53</u></b> | 1.10         | 1.10        | 0.99        | 1.00        | 1.03              | 1.03        |
| SAV (2)      | 1.24                        | 1.04        | 0.87        | 1.56        | 1.90        |  | 1.40                   | 0.77        | <b><u>0.53</u></b> | 1.09            | 0.57               | 0.54               | 1.22         | 1.19        | 1.09        | 1.01        | 1.03              | 0.99        |
| OSH (2)      | 1.33                        | 0.72        | 0.63        | 1.93        | 0.91        |  | 1.59                   | 0.67        | <b><u>0.43</u></b> | 1.25            | 0.48               | 0.44               | 1.09         | 1.05        | 0.88        | 0.80        | 0.88              | 0.75        |
| WET (2)      | 1.35                        | 1.36        | 1.63        | 1.40        | 4.78        |  | 1.81                   | 1.38        | 1.29               | 2.01            | 1.25               | <b><u>1.23</u></b> | 2.48         | 2.57        | 1.76        | 2.02        | 1.65              | 1.68        |
| Overall (39) | <b>1.14</b>                 | <b>0.83</b> | <b>0.92</b> | <b>1.44</b> | <b>3.04</b> |  | <b>1.38</b>            | <b>0.79</b> | <b>0.63</b>        | <b>1.20</b>     | <b>0.63</b>        | <b><u>0.61</u></b> | <b>1.23</b>  | <b>4.78</b> | <b>1.12</b> | <b>1.14</b> | <b>1.08</b>       | <b>1.11</b> |

5

**Table S11.** Mean bias (in mm day<sup>-1</sup>) for the  $E_p$  methods per biome. The best performing method per biome is indicated in bold and is underlined. Based on the validation dataset and on unstressed days only defined using the energy balance criterion (See Table S9 for details).

|              | Radiation, Temperature, VPD |                    |             |             |             |  | Radiation, Temperature |             |                     | Radiation       |             |                    | Thornthwaite       |                    | Temperature  |              | Hargreaves-Samani |                     |
|--------------|-----------------------------|--------------------|-------------|-------------|-------------|--|------------------------|-------------|---------------------|-----------------|-------------|--------------------|--------------------|--------------------|--------------|--------------|-------------------|---------------------|
|              | Penman-Monteith             |                    |             | Penman      |             |  | Priestley and Taylor   |             |                     | Milly and Dunne |             |                    |                    |                    |              |              |                   |                     |
|              | Ref. crop                   | Standard           | Biome       | Ref. crop   | Standard    |  | Ref. crop              | Standard    | Biome               | Ref. crop       | Standard    | Biome              |                    |                    |              |              |                   |                     |
| CRO (4)      | 1.19                        | -0.48              | 0.88        | 2.91        | 2.71        |  | 2.25                   | 0.50        | <b><u>0.04</u></b>  | 1.46            | -0.23       | 0.14               | -0.62              | -0.55              | -1.58        | -0.47        | -0.97             | 0.23                |
| GRA (7)      | 2.69                        | 0.54               | 1.16        | 4.43        | 1.91        |  | 3.70                   | 1.10        | <b><u>0.04</u></b>  | 2.63            | 0.25        | -0.06              | -0.12              | 31.38              | -0.56        | -0.63        | 0.12              | 0.20                |
| DBF (5)      | 0.28                        | -0.48              | 0.86        | 1.26        | 2.64        |  | 1.80                   | 0.94        | <b><u>-0.07</u></b> | 0.72            | -0.15       | -0.18              | -1.95              | -2.04              | -2.49        | -0.75        | -2.03             | 0.19                |
| EBF (3)      | 0.71                        | <b><u>0.04</u></b> | 0.96        | 1.41        | 1.78        |  | 1.38                   | 0.76        | 0.14                | 0.80            | 0.16        | -0.13              | -0.81              | -0.27              | -0.52        | -0.33        | -0.81             | 0.23                |
| ENF (9)      | 1.29                        | 0.46               | 1.21        | 2.05        | 1.05        |  | 2.07                   | 1.18        | <b><u>-0.03</u></b> | 1.91            | 0.93        | 0.06               | -0.06              | 0.05               | -0.73        | -0.53        | -0.29             | 0.27                |
| MF (2)       | 2.30                        | 0.68               | 0.17        | 3.38        | 1.98        |  | 3.35                   | 1.49        | 0.00                | 2.61            | 0.91        | <b><u>0.00</u></b> | 0.78               | 0.26               | 0.05         | -0.52        | 0.37              | 0.35                |
| CSH (1)      | 1.07                        | 0.50               | -0.20       | 1.65        | 1.62        |  | 1.48                   | 1.05        | <b><u>-0.08</u></b> | 1.02            | 0.54        | -0.22              | 0.22               | 0.42               | 0.19         | -0.54        | 0.27              | -0.23               |
| WSA (2)      | 2.68                        | 1.14               | 0.08        | 3.69        | 3.86        |  | 3.64                   | 1.42        | <b><u>-0.06</u></b> | 2.34            | 0.39        | -0.26              | -0.16              | -0.26              | -0.22        | -0.41        | 0.07              | -0.05               |
| SAV (2)      | 2.58                        | 1.30               | 0.33        | 3.60        | 3.71        |  | 3.31                   | 1.44        | -0.17               | 2.23            | 0.55        | -0.14              | 0.07               | <b><u>0.04</u></b> | 0.44         | -0.85        | 0.58              | -0.21               |
| OSH (2)      | 4.17                        | 1.62               | 0.24        | 6.06        | 2.69        |  | 4.97                   | 1.96        | 0.06                | 3.81            | 1.13        | -0.10              | 1.10               | 0.90               | 0.71         | -0.55        | 1.37              | <b><u>-0.05</u></b> |
| WET (2)      | 2.58                        | 1.52               | 2.18        | 4.51        | 5.19        |  | 3.69                   | 2.26        | 1.56                | 3.49            | 1.65        | 1.20               | 1.63               | 0.36               | -0.43        | -1.23        | 0.46              | <b><u>0.03</u></b>  |
| Overall (39) | <b>1.96</b>                 | <b>0.62</b>        | <b>0.72</b> | <b>3.18</b> | <b>2.65</b> |  | <b>2.88</b>            | <b>1.28</b> | <b>0.13</b>         | <b>2.09</b>     | <b>0.56</b> | <b>0.03</b>        | <b><u>0.01</u></b> | <b>2.75</b>        | <b>-0.47</b> | <b>-0.62</b> | <b>-0.08</b>      | <b>0.09</b>         |

## References

1. Brutsaert, W., *Evaporation into the atmosphere. Theory, history and applications*. 1982, Dordrecht: D. Reidel Publishing Company. 299.
2. Rigden, A.J. and G.D. Salvucci, *Evapotranspiration based on equilibrated relative humidity (ETRHEQ): Evaluation over the continental US*. Water Resources Research, 2015. **51**(4): p. 2951-2973.
3. Moureaux, C., et al., *Annual net ecosystem carbon exchange by a sugar beet crop*. Agricultural and Forest Meteorology, 2006. **139**(1): p. 25-39.
4. Anthoni, P.M., et al., *Winter wheat carbon exchange in Thuringia, Germany*. Agricultural and Forest Meteorology, 2004. **121**(1): p. 55-67.
5. Prescher, A.-K., T. Grünwald, and C. Bernhofer, *Land use regulates carbon budgets in eastern Germany: From NEE to NBP*. Agricultural and Forest Meteorology, 2010. **150**(7): p. 1016-1025.
6. Fischer, M.L., et al., *Spatiotemporal variations in growing season exchanges of CO<sub>2</sub>, H<sub>2</sub>O, and sensible heat in agricultural fields of the Southern Great Plains*. Earth Interactions, 2007. **11**(17): p. 1-21.
7. Chu, H., et al., *Net ecosystem methane and carbon dioxide exchanges in a Lake Erie coastal marsh and a nearby cropland*. Journal of Geophysical Research: Biogeosciences, 2014. **119**(5): p. 722-740.
8. Fares, S., et al., *Ozone deposition to an orange orchard: Partitioning between stomatal and non-stomatal sinks*. Environmental Pollution, 2012. **169**(Supplement C): p. 258-266.
9. Amos, B., T.J. Arkebauer, and J.W. Doran, *Soil surface fluxes of greenhouse gases in an irrigated maize-based agroecosystem*. Soil Science Society of America Journal, 2005. **69**(2): p. 387-395.
10. Beringer, J., et al., *An introduction to the Australian and New Zealand flux tower network—OzFlux*. Biogeosciences, 2016.
11. Isaac, P., et al., *OzFlux Data: Network integration from collection to curation*. Biogeosciences Discuss., 2016. **2016**: p. 1-41.
12. Kato, T., et al., *Temperature and biomass influences on interannual changes in CO<sub>2</sub> exchange in an alpine meadow on the Qinghai-Tibetan Plateau*. Global Change Biology, 2006. **12**(7): p. 1285-1298.
13. Galvagno, M., et al., *Phenology and carbon dioxide source/sink strength of a subalpine grassland in response to an exceptionally short snow season*. Environmental Research Letters, 2013. **8**(2): p. 025008.
14. Bowling, D.R., et al., *Carbon, water, and energy fluxes in a semiarid cold desert grassland during and following multiyear drought*. Journal of Geophysical Research: Biogeosciences, 2010. **115**(G4): p. n/a-n/a.
15. Twine, T.E., et al., *Correcting eddy-covariance flux underestimates over a grassland*. Agricultural and Forest Meteorology, 2000. **103**(3): p. 279-300.
16. Biederman, J.A., et al., *Terrestrial carbon balance in a drier world: the effects of water availability in southwestern North America*. Global change biology, 2016. **22**(5): p. 1867-1879.
17. Ma, S., et al., *Inter-annual variability in carbon dioxide exchange of an oak/grass savanna and open grassland in California*. Agricultural and Forest Meteorology, 2007. **147**(3): p. 157-171.
18. Scott, R.L., et al., *Carbon dioxide exchange in a semidesert grassland through drought-induced vegetation change*. Journal of Geophysical Research: Biogeosciences, 2010. **115**(G3): p. n/a-n/a.
19. Stevens, R.M., et al., *Water use by an irrigated almond orchard*. Irrigation Science, 2012. **30**(3): p. 189-200.
20. Ahrends, H.E., et al., *Tree phenology and carbon dioxide fluxes: use of digital photography for process-based interpretation at the ecosystem scale*. Climate Research, 2009. **39**(3): p. 261-274.
21. Pilegaard, K., et al., *Increasing net CO<sub>2</sub> uptake by a Danish beech forest during the period from 1996 to 2009*. Agricultural and Forest Meteorology, 2011. **151**(7): p. 934-946.
22. Ferréa, C., et al., *Estimating heterotrophic and autotrophic soil respiration in a semi-natural forest of Lombardy, Italy*. Pedobiologia, 2012. **55**(6): p. 285-294.

23. Schmid, H.P., et al., *Measurements of CO<sub>2</sub> and energy fluxes over a mixed hardwood forest in the mid-western United States*. Agricultural and Forest Meteorology, 2000. **103**(4): p. 357-374.
24. Noormets, A., et al., *Drought during canopy development has lasting effect on annual carbon balance in a deciduous temperate forest*. New Phytologist, 2008. **179**(3): p. 818-828.
- 5 25. Cook, B.D., et al., *Carbon exchange and venting anomalies in an upland deciduous forest in northern Wisconsin, USA*. Agricultural and Forest Meteorology, 2004. **126**(3): p. 271-295.
26. Noormets, A., et al., *Moisture sensitivity of ecosystem respiration: Comparison of 14 forest ecosystems in the Upper Great Lakes Region, USA*. Agricultural and Forest Meteorology, 2008. **148**(2): p. 216-230.
- 10 27. Steininger, M.K., *Net carbon fluxes from forest clearance and regrowth in the Amazon*. Ecological Applications, 2004. **14**(sp4): p. 313-322.
28. Rambal, S., et al., *The growth respiration component in eddy CO<sub>2</sub> flux from a Quercus ilex mediterranean forest*. Global Change Biology, 2004. **10**(9): p. 1460-1469.
29. Yasuda, Y., et al., *Measurement of CO<sub>2</sub> flux above a tropical rain forest at Pasoh in Peninsular Malaysia*. Agricultural and Forest Meteorology, 2003. **114**(3): p. 235-244.
- 15 30. Cleverly, J., et al., *Aerodynamic resistance and Penman–Monteith evapotranspiration over a seasonally two-layered canopy in semiarid central Australia*. Journal of Hydrometeorology, 2013. **14**(5): p. 1562-1570.
31. Bond-Lamberty, B., C. Wang, and S.T. Gower, *Net primary production and net ecosystem production of a boreal black spruce wildfire chronosequence*. Global Change Biology, 2004. **10**(4): p. 473-487.
- 20 32. Bergeron, O., et al., *Comparison of carbon dioxide fluxes over three boreal black spruce forests in Canada*. Global Change Biology, 2007. **13**(1): p. 89-107.
33. Mkhabela, M.S., et al., *Comparison of carbon dynamics and water use efficiency following fire and harvesting in Canadian boreal forests*. Agricultural and Forest Meteorology, 2009. **149**(5): p. 783-794.
- 25 34. Arain, M.A. and N. Restrepo-Coupe, *Net ecosystem production in a temperate pine plantation in southeastern Canada*. Agricultural and Forest Meteorology, 2005. **128**(3): p. 223-241.
35. Mauder, M., et al., *A strategy for quality and uncertainty assessment of long-term eddy-covariance measurements*. Agricultural and Forest Meteorology, 2013. **169**(Supplement C): p. 122-135.
- 30 36. Zimmermann, F., et al., *Atmospheric N- and S-fluxes to a spruce forest—Comparison of inferential modelling and the throughfall method*. Atmospheric Environment, 2006. **40**(25): p. 4782-4796.
37. Grünwald, T. and C. Bernhofer, *A decade of carbon, water and energy flux measurements of an old spruce forest at the Anchor Station Tharandt*. Tellus B, 2007. **59**(3): p. 387-396.
38. Mammarella, I., et al., *Relative humidity effect on the high-frequency attenuation of water vapor flux measured by a closed-path eddy covariance system*. Journal of Atmospheric and Oceanic Technology, 2009. **26**(9): p. 1856-1866.
- 35 39. Moderow, U., C. Feigenwinter, and C. Bernhofer, *Non-turbulent fluxes of carbon dioxide and sensible heat—A comparison of three forested sites*. Agricultural and Forest Meteorology, 2011. **151**(6): p. 692-708.
- 40 40. Klimpt, J., E. Frieze, and H. Elbern, *Joint CO<sub>2</sub> state and flux estimation with the 4D-Var system EURAD-IM*. Geosci. Model Dev. Discuss., 2016. **2016**: p. 1-24.
41. Chiesi, M., et al., *Modelling carbon budget of Mediterranean forests using ground and remote sensing measurements*. Agricultural and Forest Meteorology, 2005. **135**(1): p. 22-34.
42. Gioli, B., et al., *Comparison between tower and aircraft-based eddy covariance fluxes in five European regions*. Agricultural and Forest Meteorology, 2004. **127**(1): p. 1-16.
- 45 43. Milyukova, I.M., et al., *Carbon balance of a southern taiga spruce stand in European Russia*. Tellus B, 2002. **54**(5): p. 429-442.
44. Goldstein, A.H., et al., *Effects of climate variability on the carbon dioxide, water, and sensible heat fluxes above a ponderosa pine plantation in the Sierra Nevada (CA)*. Agricultural and Forest Meteorology, 2000. **101**(2): p. 113-129.
- 50 45. Bond-Lamberty, B., C. Wang, and S.T. Gower, *A global relationship between the heterotrophic and autotrophic components of soil respiration?* Global Change Biology, 2004. **10**(10): p. 1756-1766.
46. Campbell, J.L. and B.E. Law, *Forest soil respiration across three climatically distinct chronosequences in Oregon*. Biogeochemistry, 2005. **73**(1): p. 109-125.

47. Irvine, J., et al., *Age-related changes in ecosystem structure and function and effects on water and carbon exchange in ponderosa pine*. Tree Physiology, 2004. **24**(7): p. 753-763.
48. Blanken, P.D., et al., *A comparison of water and carbon dioxide exchange at a windy alpine tundra and subalpine forest site near Niwot Ridge, Colorado*. Biogeochemistry, 2009. **95**(1): p. 61-76.
- 5 49. Nakai, T., et al., *Characteristics of evapotranspiration from a permafrost black spruce forest in interior Alaska*. Polar Science, 2013. **7**(2): p. 136-148.
50. Noormets, A., J. Chen, and T.R. Crow, *Age-dependent changes in ecosystem carbon fluxes in managed forests in Northern Wisconsin, USA*. Ecosystems, 2007. **10**(2): p. 187-203.
51. García, A.G., et al., *Patterns and controls of carbon dioxide and water vapor fluxes in a dry forest of central Argentina*. Agricultural and Forest Meteorology, 2017. **247**(Supplement C): p. 520-532.
- 10 52. Aubinet, M., et al., *Long term carbon dioxide exchange above a mixed forest in the Belgian Ardennes*. Agricultural and Forest Meteorology, 2001. **108**(4): p. 293-315.
53. McCaughey, J.H., et al., *Carbon dioxide and energy fluxes from a boreal mixedwood forest ecosystem in Ontario, Canada*. Agricultural and Forest Meteorology, 2006. **140**(1): p. 79-96.
- 15 54. Desai, A.R., *Climatic and phenological controls on coherent regional interannual variability of carbon dioxide flux in a heterogeneous landscape*. Journal of Geophysical Research: Biogeosciences, 2010. **115**(G3): p. n/a-n/a.
55. Reichstein, M., et al., *Inverse modeling of seasonal drought effects on canopy CO<sub>2</sub>/H<sub>2</sub>O exchange in three Mediterranean ecosystems*. Journal of Geophysical Research 2003. **108**(D23): p. 4726.
- 20 56. Dore, S., et al., *Cross validation of open-top chamber and eddy covariance measurements of ecosystem CO<sub>2</sub> exchange in a Florida scrub-oak ecosystem*. Global Change Biology, 2003. **9**(1): p. 84-95.
57. Chen, Q., et al., *Estimating basal area and stem volume for individual trees from lidar data*. Photogrammetric Engineering & Remote Sensing, 2007. **73**(12): p. 1355-1365.
- 25 58. Ardö, J., et al., *Seasonal variation of carbon fluxes in a sparse savanna in semi arid Sudan*. Carbon balance and management, 2008. **3**(1): p. 7.
59. Williams, C.A., et al., *Complexity in water and carbon dioxide fluxes following rain pulses in an African savanna*. Oecologia, 2009. **161**(3): p. 469-480.
60. Cleverly, J., et al., *Productivity and evapotranspiration of two contrasting semiarid ecosystems following the 2011 global carbon land sink anomaly*. Agricultural and Forest Meteorology, 2016. **220**(Supplement C): p. 151-159.
- 30 61. Sanchez-Mejia, Z.M. and S.A. Papuga, *Observations of a two-layer soil moisture influence on surface energy dynamics and planetary boundary layer characteristics in a semiarid shrubland*. Water Resources Research, 2014. **50**(1): p. 306-317.
- 35 62. Scott, R.L., *Using watershed water balance to evaluate the accuracy of eddy covariance evaporation measurements for three semiarid ecosystems*. Agricultural and Forest Meteorology, 2010. **150**(2): p. 219-225.
63. Loubet, B., et al., *Carbon, nitrogen and Greenhouse gases budgets over a four years crop rotation in northern France*. Plant and Soil, 2011. **343**(1): p. 109.
- 40 64. Zona, D., et al., *Cold season emissions dominate the Arctic tundra methane budget*. Proceedings of the National Academy of Sciences, 2016. **113**(1): p. 40-45.
65. Sulman, B., et al., *Contrasting carbon dioxide fluxes between a drying shrub wetland in Northern Wisconsin, USA, and nearby forests*. Biogeosciences, 2009. **6**(6): p. 1115-1126.
66. Detto, M., et al., *Comparing laser-based open- and closed-path gas analyzers to measure methane fluxes using the eddy covariance method*. Agricultural and Forest Meteorology, 2011. **151**(10): p. 1312-1324.
- 45
