# Supplementary material for: Potential evaporation at eddy-covariance sites across the globe
Source: Copernicus journal article supplement (doi:10.5194/hess-23-925-2019), 2019-02-18
Supplement: Supplementary file 2 [file hess-23-925-2019-supplement.zip]

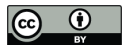

## *Supplement of*

# **Potential evaporation at eddy-covariance sites across the globe**

**Wouter H. Maes et al.**

*Correspondence to:* Wouter H. Maes (wh.maes@ugent.be)

- hess-23-925-2019-supplement-title-page.pdf
- Maes\_et\_al\_Ep\_Scripts
  - AU-How\_DailyFlux.mat
  - AU-How\_Ecosystem.mat
  - CalculatingEp.asv
  - CalculatingEp.m
  - VegType\_EF.mat
  - VegType\_SWC.mat
- Maes\_et\_al\_Ep\_Supplement.pdf

The copyright of individual parts of the supplement might differ from the CC BY 4.0 License.
